## RESEARCH ARTICLE

# Mutation of an *Arabidopsis* Golgi membrane protein ELMO1 reduces cell adhesion

Bruce D. Kohorn<sup>1,\*</sup>, Frances D. H. Zorensky<sup>1</sup>, Jacob Dexter-Meldrum<sup>1</sup>, Salem Chabout<sup>2</sup>, Gregory Mouille<sup>2</sup> and Susan Kohorn<sup>1</sup>

## ABSTRACT

Plant growth, morphogenesis and development involve cellular adhesion, a process dependent on the composition and structure of the extracellular matrix or cell wall. Pectin in the cell wall is thought to play an essential role in adhesion, and its modification and cleavage are suggested to be highly regulated so as to change adhesive properties. To increase our understanding of plant cell adhesion, a population of ethyl methanesulfonate-mutagenized *Arabidopsis* were screened for hypocotyl adhesion defects using the pectin binding dye Ruthenium Red that penetrates defective but not wild-type (WT) hypocotyl cell walls. Genomic sequencing was used to identify a mutant allele of *ELMO1* which encodes a 20 kDa Golgi membrane protein that has no predicted enzymatic domains. ELMO1 colocalizes with several Golgi markers and *elmo1*<sup>-/-</sup> plants can be rescued by an ELMO1-GFP fusion. *elmo1*<sup>-/-</sup> exhibits reduced mannose content relative to WT but no other cell wall changes and can be rescued to WT phenotype by mutants in *ESMERALDA1*, which also suppresses other adhesion mutants. *elmo1* describes a previously unidentified role for the ELMO1 protein in plant cell adhesion.

**KEY WORDS:** Adhesion, Cell wall, Mannose, ELMO1, *Arabidopsis*

## INTRODUCTION

The regulation of cell adhesion and cell separation in angiosperms is crucial for growth and development and is dependent upon the cell wall that lies between adjacent cells. During cytokinesis in plants, a new membrane-bound cell plate expands to fuse with the primary cell wall of the daughter cells (Miart et al., 2014; van Oostende-Triplet et al., 2017). This cell plate is formed by the fusion of vesicles from the Golgi at the phragmoplast, a structure established during anaphase that acts as the scaffold for cell plate construction (Reichardt et al., 2007; Verma, 2001). Soon after vesicle fusion and the establishment of the cell plate, callose is deposited, with cellulose accumulating and replacing callose as the plate matures (Drakakaki, 2015; Samuels et al., 1995). As the plate expands to fuse with the existing walls, pectin, hemicellulose and cellulose are deposited on either side of the plate, forming the primary cell walls of the daughter cells (Miart et al., 2014; van Oostende-Triplet et al., 2017). The daughters are formed with the completion of the new primary wall but remain connected by the cell plate, which then becomes the middle lamella region (Stachelin and Hepler, 1996).

During cell growth and differentiation, old cell wall material is pushed away from the plasma membrane while new material is deposited at the membrane, providing an explanation for the high concentration of pectin in the middle lamella as a result of its early deposition at the cell plate during cell division (Keegstra, 2010).

In the cell walls of dicots the pectin family are polymers of galacturonic acid, predominantly homogalacturonan (HG), and less abundant rhamnogalacturonan I (RG-I) and rhamnogalacturonan II (RG-II) (Mohnen, 2008). HG is a linear polymer composed of galactopyranosyluronic acid (GalpA) that undergoes methylesterification and O-acetylation, whereas RG-I is composed of repeating Rhamnose-GalA (Rha-GalA) units, partially O-acetylated, and RG-II is composed of 1,4-linked GalA residues that have oligosaccharide sidechains and branched structures (Ridley et al., 2001). Though all three of these pectins contribute to the structure and function of the cell wall, HG pectin is thought to be primarily responsible for adhesion and is concentrated in the middle lamella and at cellular junctions (Daher and Braybrook, 2015).

The synthesized HG pectin polysaccharide deposited at the cell wall and middle lamella is highly methylesterified and then can be de-methylesterified by pectin methylesterases (PMEs) localized to the cell wall (Mohnen, 2008). The PME initiates the hydrolysis of the methyl-ester bond at the C-6 residues of the HG polymer to remove the methyl group and creates a negative charge on the carboxyl group of the backbone (Sénéchal et al., 2014). As a result of its change in charge, physicochemical and consequently mechanical properties of the cell wall are greatly modified. Furthermore, the de-esterified pectin is able to ionically bond with calcium cations. In its esterified state, *in vitro*, the HG pectin is more fluid; de-esterification allows for calcium cross-linking, causing the pectin to gel into a more rigid matrix structure. This phenomenon may occur *in vivo* in the middle lamella in the presence of calcium (Daher and Braybrook, 2015; Wolf and Höfte, 2014). The enzymatic activity of PMEs is countered by pectin methylesterase inhibitors (PMEIs). To restrict de-esterification, the PMEI forms a stable noncovalent complex with PME, preventing the methyl substrate from binding to the putative active site on the methylesterase (Harholt et al., 2010; Wormit and Usadel, 2018).

Analyses of pectin deposition, synthesis and modification support the significant role of pectin in cellular adhesion. The *Arabidopsis* *EMB30* (*GNOM*) gene, which encodes a protein similar to yeast Sec7p, and is required for directing the transport of vesicles from the endoplasmic reticulum to the Golgi, is important for cellular growth and adhesion during development (Shevell et al., 2000). The *emb30* mutant disrupts the localization of pectin in the secretory pathway and affects adhesion and, as a result, growth. The Trans-Golgi-Network (TGN) ECHIDNA protein also affects trafficking of cell wall polysaccharides and the integrity of the cell wall (Gendre et al., 2011; 2013). The level of esterification and de-esterification of pectin, as well as the composition of the middle

<sup>1</sup>Department of Biology, Bowdoin College, ME 04011, USA. <sup>2</sup>JPB, INRAE, AgroParisTech, Université Paris-Saclay, RD10, 78026 Versailles Cedex, France.

\*Author for correspondence (bkohorn@bowdoin.edu)

 B.D.K., 0000-0003-4522-3462; G.M., 0000-0002-5493-754X

Handling Editor: Ykä Helariutta

Received 8 January 2021; Accepted 16 April 2021

lamella, has been suggested to impact cellular adhesion. HG pectin and calcium ions are abundant in the middle lamella, and de-esterification causes the formation of a pectate gel *in vitro* (Daher and Braybrook, 2015). The level and pattern of methylesterification affects physical properties including resistance to compressibility of the extracellular matrix (ECM) (Willats et al., 2001). Increased PME1 expression, which causes higher levels of pectin methylesterification, has been linked to inhibition of growth in *Arabidopsis* (Jonsson et al., 2021; Peaucelle et al., 2011; Willats et al., 2001). Moreover, demethylesterification reveals substrates for pectate lyase and homogalacturonase, and this instead can lead to a loss of cell adhesion. These findings indicate that changes to the structure of the middle lamella influence cellular adhesion and that fine tuning of the methylesterification level of HG is required for proper morphogenesis.

Glycosyltransferases and methyltransferases involved in the synthesis and modification of pectin have emerged as possible key players in cellular adhesion. The *QUASIMODO1* gene (*QUA1*) encodes a glycosyltransferase, and *qua1-1* and *qua1-2* mutants display a dwarfed growth and defective adhesion phenotype in *Arabidopsis* (Bouton et al., 2002). These mutants also have cell protrusions occurring in the cotyledons, leaves and hypocotyls, as well as cell detachment and gapping at the hypocotyl, indicating failed cellular adhesion. Biochemical analyses indicate that *qua1-1* mutants have 25% less HG pectin in the cell wall than wild type (WT), and this is corroborated by reduced immunohistochemical staining of pectin epitopes, whereas levels of rhamnose, arabinose and galactose remained the same (Bouton et al., 2002). In addition, in cell culture *qua1-1* mutant shows lower levels of methylesterification of pectin (Leboeuf et al., 2005).

Mutants of the *QUASIMODO2* gene (*QUA2*), which encodes a membrane protein with HG methyltransferase activity (Du et al., 2020) localized to the Golgi, show similar phenotypes to *qua1-1* and *qua1-2*, further indicating that the synthesis and modification of pectin affects cellular adhesion. *qua2-1* mutants also have stunted growth, defective cellular adhesion and a 50% decrease in HG pectin (Mouille et al., 2007). However, unlike *qua1* mutants, the percentage of methylesterification of HG pectin in *qua2-1* mutants is comparable with that of WT plants (Mouille et al., 2007). Separately isolated alleles of *QUA2*, initially characterized as the *TUMOROUS SHOOT DEVELOPMENT2* (*TSD2*) gene, also have reduced cellular adhesion and, in extreme mutants, display disorganized tumorous growth as well as dwarfed growth (Krupková et al., 2007). Here too, pectin modification by methyltransferases appears to affect cellular adhesion.

Together, the analysis and isolation of *QUA1* and *QUA2* mutants indicate that the amount of pectin synthesized, and its esterification by Golgi-localized glycosyltransferase and methyltransferase enzymes, directly affect cellular adhesion. However, the isolation of *QUASIMODO3* mutants provides conflicting findings complicating the model of cellular adhesion dictated by HG pectin levels. *QUA3* has a high amino acid similarity to the pectin methyl transferase *QUA2*, and is localized to the Golgi (Miao et al., 2011). Unlike *QUA2*, RNA interference-induced *qua3i* mutants do not display cellular adhesion defects nor reduced HG pectin content. Differences in pectin methylation, however, were observed in *qua3i* compared with the WT (Miao et al., 2011). These findings indicate that both the levels and degree of methylesterification are crucial for cell adhesion.

Although overall the *qua* mutants suggest that pectin deficiency is responsible for defective cellular adhesion, the isolation of other HG defective and abnormal cell adhesion mutants has indicated that this

is not always the case. Conversely, the *friable1* (*frb1*) adhesion mutant in a gene annotated as a putative *O*-fucosyltransferase (DUF246) has no effect on pectin levels, but instead reduces pectin methylesterification, galactose- and arabinose-containing oligosaccharides in the Golgi, and extensin and xyloglucan microstructure (Neumetzler et al., 2012). The *frb1* mutant phenotype includes cell dissociation manifested in the sloughing of cells and crumbling of plant tissue.

Mutations to another Golgi-localized protein annotated as a putative *O*-fucosyltransferase, also with a DUF246 domain, do not show the same cellular adhesion defect. *ESMERALDA1* (*ESMD1*) was isolated as a suppressor of *qua2-1*, and also suppresses *frb1-1*, and the *esmd1-1* mutants have no difference in phenotype compared with WT (Verger et al., 2016). Normal cellular adhesion was restored in *esmd1-1/qua2-1* plants as well as in the triple mutant *esmd1-1/qua2-1/frb1*, but the double mutant *qua2-1/frb1* displayed non-additive defective cellular adhesion (Verger et al., 2016). *esmd1-1* acts as a suppressor of *qua2* and *frb1* mutants, and lack of additivity in these mutant phenotypes and co-suppression suggest that *qua2-1* and *frb1* function in the same molecular signaling pathway. *esmd1-1* does not restore HG content of *qua2-1* mutants and the results suggest the existence of an as yet undefined signaling pathway likely responsible for the maintenance of cellular adhesion (Verger et al., 2016).

Although pectin appears to be a major contributor to cell adhesion, there are other cell wall components that contribute to cell wall structure and some may play a more minor role in adhesion. The *irregular xylem8* (*irx8*) mutant of a putative HG galacturonosyltransferase, has a reduction in xylan and HG content, causing dwarfed growth but normal cellular adhesion (Persson et al., 2007). The hemicellulose glucomannan appears to help strengthen the cell wall, and xyloglucan may act as spacer polymers to provide structural integrity (Goubet et al., 2009; Miedes et al., 2013; Xiao et al., 2016). Cellulose itself is not thought to contribute to adhesion, yet its crosslinking to hemicellulose and pectin is important in cell wall integrity, and extensins are thought to aid in this crosslinking (Du et al., 2020; Showalter and Basu, 2016). The GPI anchored, heavily glycosylated, cell surface arabinogalactan proteins (AGPs) have been suggested to play a role in adhesion but there is not as yet direct evidence (Kjellbom et al., 1997; Showalter and Basu, 2016; Tan et al., 2013).

To further explore how plant cells adhere, a mutational screen of *Arabidopsis* seedlings employed the pectin binding Ruthenium Red dye that can enter adhesion deficient, but not WT, hypocotyls (Verger, 2014; Šola et al., 2019). One of the recovered mutants named *elmo1* has patchy red staining of the hypocotyl, curling or sloughing of cells at the hypocotyl surface and a reduced mannose content. Whole-genome sequencing analysis identified the causative mutation and describes a novel 20 kDa Golgi membrane protein with no identifiable catalytic domains. *elmo1* describes a previously unidentified role for ELMO protein in cell adhesion.

## RESULTS

### Isolation of cellular adhesion mutant lines

Ruthenium Red can stain roots but not hypocotyls of WT dark-grown seedlings, but hypocotyls of the cell adhesion mutants *qua2-1* and *frb1-1* do stain red, presumably because the dye can penetrate and bind to de-esterified pectin (Verger, 2014; Šola et al., 2019). With the goal of finding key genes involved in adhesion, 5000 WT *Arabidopsis* seeds were mutagenized with ethyl methanesulfonate (EMS), self-crossed and the M2 (mutagenized F2) population were collected in 191 pools. Ruthenium Red staining was then used to identify adhesion-defective mutant plants from these pools.

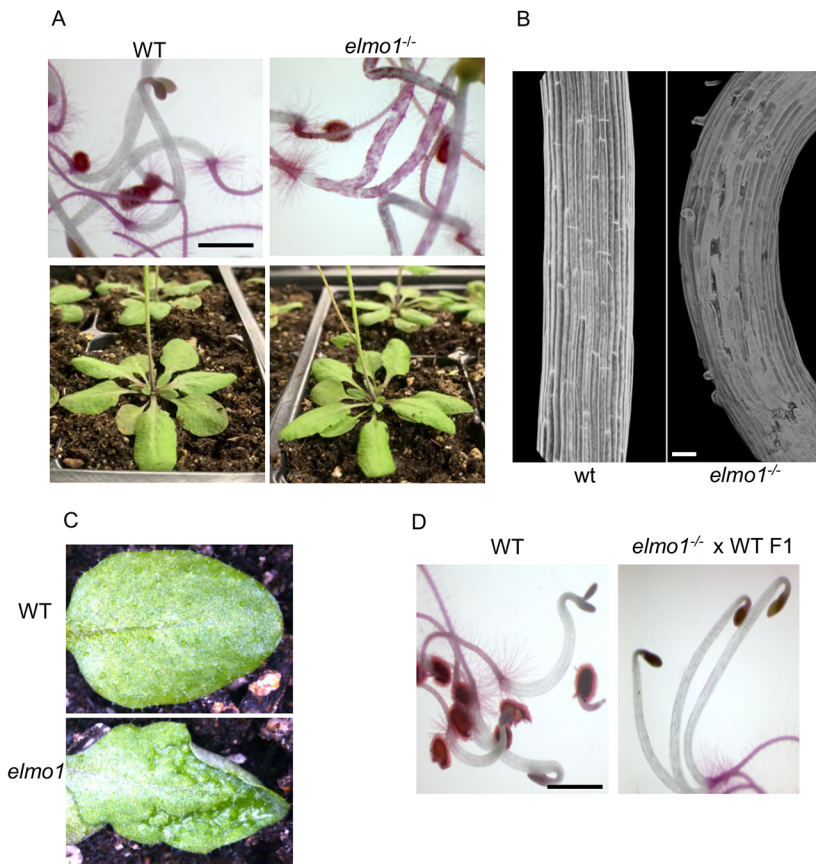

**Fig. 1. *elmo1* shows adhesion defects.** (A) WT and *elmo1*<sup>-/-</sup> dark-grown hypocotyls stained with Ruthenium Red (top panel) or grown on soil (bottom panel). (B) Confocal microscopy imaging of propidium iodide-stained *elmo1*<sup>-/-</sup> and WT dark-grown hypocotyls. (C) Soil grown leaves from the indicated genotype. (D) F1 generation of a backcross of M3 *elmo1*<sup>-/-</sup> to WT, showing adhesion is restored and *elmo1* is recessive. Scale bars: 1 mm (A,D); 50  $\mu$ m (B).

One mutant was named *elmo1* in reference to the beloved Sesame Street character who has curly red fur. The initial parental *elmo1* line was isolated from the pool and grown on agar, then transferred to soil to self-cross and produce M3 *elmo1* offspring. The M3 *elmo1* seedlings were stained to verify the inheritance of the adhesion mutation and all seedlings stained red (Fig. 1A) indicating that the M2 isolate was homozygous for the mutation. *elmo1*<sup>-/-</sup> showed patchy Ruthenium Red staining of the hypocotyl, curling cells and slight breakage, and displayed a clear adhesion defective phenotype. Confocal microscopy of propidium iodide-stained dark-grown hypocotyls showed that, relative to WT, *elmo1*<sup>-/-</sup> hypocotyl cells curled away from each other, leaving gaps and disorganized regions (Fig. 1B). On soil, *elmo1*<sup>-/-</sup> appeared as the WT (Fig. 1A), except that in some older leaves a rough and bubbling appearance was observed (Fig. 1C) similar to, but not as severe as, the *frb1* and *qua* mutants (Bouton et al., 2002; Mouille et al., 2007; Neumetzler et al., 2012).

M3 *elmo1*<sup>-/-</sup> seedlings were back-crossed to WT *A. thaliana* Col0 to allow the segregation of other EMS-induced mutations in the genome and to characterize the dominance of the mutation. These heterozygote F1 offspring were stained with Ruthenium Red and none of the hypocotyls of the F1 seedlings stained red (Fig. 1D), indicating that the mutation is recessive to the WT allele.

To identify additional phenotypes, *elmo1*<sup>-/-</sup> seedlings were grown on agar plates, and the lengths of the hypocotyls and roots were measured. Fig. 2 shows that, relative to WT seedlings, *elmo1*<sup>-/-</sup> seedlings had shorter hypocotyls (unpaired two tailed *t*-test,  $P < 0.01$ ) but roots of similar length (unpaired two tailed *t*-test,  $P > 0.01$ ).

### *elmo1* is a new cell adhesion locus

To determine whether *elmo1* is a new allele of previously identified adhesion mutants, M3 *elmo1*<sup>-/-</sup> plants were crossed with *qua2-1*<sup>-/-</sup>

and *frb1-1*<sup>-/-</sup> plants to assess complementation, and Ruthenium Red staining was used to assay the phenotype of the dark-grown hypocotyls of the F1 offspring of these crosses. Fig. 3 shows that, although *elmo1*<sup>-/-</sup>, *qua2-1*<sup>-/-</sup> and *frb1*<sup>-/-</sup> all stained with the dye and showed visible adhesion defects, the F1 of *elmo1*<sup>-/-</sup> × *qua2-1*<sup>-/-</sup> and *elmo1*<sup>-/-</sup> × *frb1*<sup>-/-</sup> offspring displayed a WT adhesion phenotype, with no staining or abnormal curling cells. The restoration of normal adhesion in the offspring of these crosses resulted from genetic complementation, arguing that the *elmo1* mutation does not occur within the *QUA2* or *FRB1* gene.

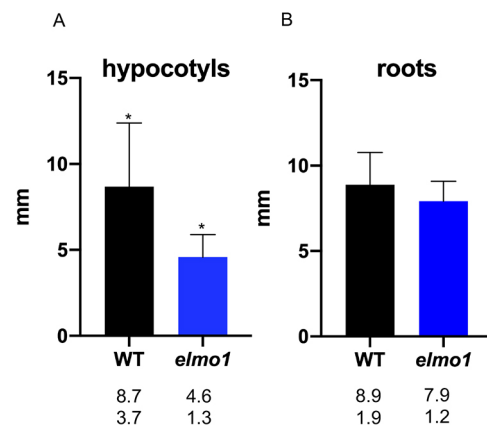

**Fig. 2. *elmo1* hypocotyls, but not roots, are shorter than WT hypocotyls.** (A,B) Dark-grown *elmo1* and WT hypocotyls (A) or roots (B) were measured using ImageJ. Length in mm. \* $P < 0.01$  (unpaired two tailed *t*-test). Numbers below each bar show mean (top) and standard deviation (bottom).



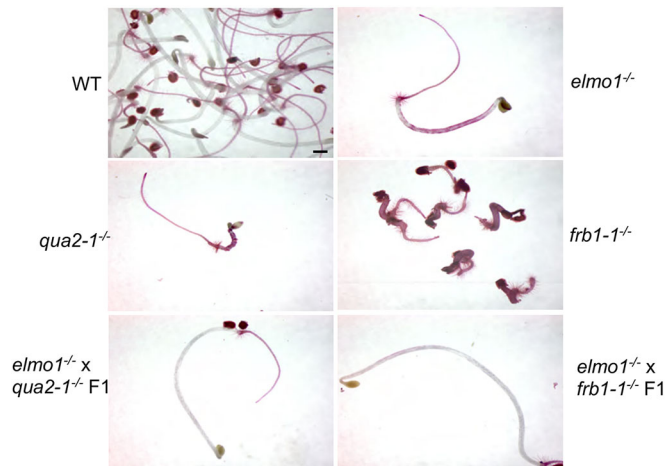

**Fig. 3. *elmo1* is not complemented by *qua-2* or *frb-1*.** The indicated dark-grown hypocotyls were stained with Ruthenium Red dye. F1 progeny do not have adhesion defects, indicating *elmo1* is not a new allele of *QUA2* or *FRBL1*. Scale bar: 1 mm.

### Genome sequence of *elmo1*<sup>-/-</sup>

To identify the mutation causing the *elmo1*<sup>-/-</sup> phenotype, F1 seeds of the *elmo1*<sup>-/-</sup> × WT cross were sown on soil and self-crossed. Of the F2 offspring, a quarter were expected to be homozygous for the *elmo1* cell adhesion mutation, but other EMS-induced background mutations present in these F2 *elmo1*<sup>-/-</sup> would be expected to have segregated and appear at less than 100% frequency. Whole-genome sequencing of the pooled *elmo1*<sup>-/-</sup> F2 allows for the identification of mutations that occur with 100% frequency, and thus are candidate causative mutations (Verger et al., 2016). The F2 seeds were therefore collected and germinated and grown in liquid media for 4 days in the dark at 20°C and stained with Ruthenium Red to identify the individuals homozygous for *elmo1*. We pooled 450 dark-grown F2 hypocotyls from the *elmo1*<sup>-/-</sup> × WT cross displaying the *elmo1* mutant phenotype and the extracted DNA underwent whole-genome sequencing. artMAP software (Javorka et al., 2019) was used to analyze sequencing data and identified only four mutations occurring with 100% frequency (Fig. S1). However, of the four, three were mutations in transposable elements and these candidates were given lower priority owing to the low likelihood of their role in adhesion. The remaining mutation occurring with 100% frequency was mapped to position 13828788 in At2g32580, where the mutation causes an adenine in the place of a guanine at the 3' splice junction of the 2nd intron (Fig. S2). This change likely could impact mRNA transcript levels of the gene.

In WT *Arabidopsis*, At2g32580 is predicted to encode a 183 amino acid 19.967 kDa protein (DUF1068) (Figs S2, S3). The mRNA is expressed in most plant structures and during almost all developmental stages (TAIR; ThaleMine), but whereas ELMO is predicted to be a Golgi membrane protein, there are no identifiable catalytic or binding domains present (TAIR; ThaleMine). InterPro (Mitchell et al., 2019) predicts a signal sequence, a membrane anchor, a Golgi luminal domain and a coiled structure.

### *elmo1*<sup>-/-</sup> is complemented by At2g32580

To verify that the mutation in At2g32580 is indeed responsible for the *elmo1* phenotype, the WT coding region of At2g32580 using the native start and stop codons was expressed under the control of the 35S promoter by transformation of *elmo1*<sup>-/-</sup> plants. T2 hygromycin-resistant plants were then grown in liquid medium in

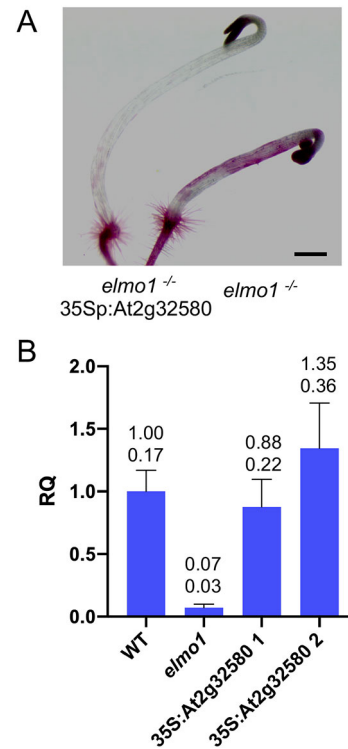

**Fig. 4. At2g32580 complements *elmo1*<sup>-/-</sup>.** (A) Ruthenium Red-stained dark-grown hypocotyls of *elmo1*<sup>-/-</sup> or *elmo1*<sup>-/-</sup> transformed with 35S:At2g3250. (B) Relative quantitation (RQ) using RT-qPCR of the indicated genotype, relative to actin. 35S:At2g32580 1 and 35S:At2g32580 2 indicate two independent *elmo1*<sup>-/-</sup> 35S:At2g3250 transformants. Numbers above each bar show mean (top) and standard deviation (bottom). The *elmo1* mutant has an almost 6-fold reduction (unpaired two tailed *t*-test,  $P < 0.01$ ) of At2g32580 expression relative to WT. At2g32580 levels in the two isolates of *elmo1*<sup>-/-</sup> 35S:At2g32580 are not distinguishable from WT (unpaired two tailed *t*-test,  $P > 0.01$ ). Scale bar: 0.5 mm.

the dark for 4 days, and the hypocotyls were stained with Ruthenium Red. Fig. 4A shows that *elmo1*<sup>-/-</sup> 35S:At2g32580 transformed seedlings have greatly reduced staining and no visible cell adhesion defects relative to *elmo1*<sup>-/-</sup> seedlings, indicating that At2g32580 can indeed complement the *elmo1* allele.

The *elmo1* mutation in At2g32580 is predicted to inhibit the removal of the second intron, and thereby cause a change in mRNA accumulation. RT-qPCR was used to measure the levels of At2g32580 mRNA expression relative to actin in dark-grown hypocotyls of WT, *elmo1*<sup>-/-</sup> and two different *elmo1*<sup>-/-</sup> 35S:At2g32580 independent transformants (1,2) (Fig. 4B). The *elmo1* mutant showed an almost 6-fold reduction (unpaired two tailed *t*-test,  $P < 0.01$ ) of At2g32580 expression relative to WT. At2g32580 levels in the two isolates of *elmo1*<sup>-/-</sup> 35S:At2g32580 were not distinguishable from WT (unpaired two tailed *t*-test,  $P > 0.01$ ). The results indicate that the mutation at the predicted splice junction of intron 2 and exon 3 leads to a dramatic reduction in the expression of exon 3. Although the mutation is expected to eliminate splicing at this junction, it remains to be determined how the levels of protein are affected; as exon three is not detected by RT-qPCR (Fig. 4B) it is likely that at least the carboxyl terminal two thirds of the protein is not expressed.

Although the *elmo1* mutation was complemented by an ELMO1-GFP fusion protein, and was the only mutation of significance that appeared at 100% frequency in the segregation and sequencing analysis, an independent allele was obtained from the *Arabidopsis* Biological Resource Centre (ABRC) to provide further evidence

that *elmo1* is linked to cell adhesion defects. The new mutation (now called *elmo1-2*) is a T-DNA insertion (SALK019927C) located 252 base pairs 5' to the predicted start of translation, in the 350 bp long 5' untranslated region (Fig. S2). Although WT hypocotyls do not stain with Ruthenium Red, *elmo1-2*<sup>-/-</sup> seedlings homozygous for this T-DNA insertion did stain, but more lightly than *elmo1-1*<sup>-/-</sup> (Fig. S4A). Confocal microscopy imaging of propidium iodide-stained dark-grown hypocotyls is shown in Fig. S4B, and reveals that *elmo1-2*<sup>-/-</sup> cells appeared more disorganized than in WT, but did not curl away as in *elmo1-1*<sup>-/-</sup>. Thus *elmo1-2*<sup>-/-</sup> appears to be a weaker allele than *elmo1-1*<sup>-/-</sup>.

### ELMO1 is a Golgi protein

ELMO1 is predicted to be localized to the Golgi (SUBA and ARAPORT), and an extensive proteomic analysis identifies ELMO1 as resident to the medial Golgi (Parsons et al., 2019). To provide a separate confirmation of the proteomics localization, At2g32580 was also expressed with a carboxyl-terminal GFP domain in *elmo1*<sup>-/-</sup> plants. The T2 generation of this transformation is shown in Fig. 5A, in which WT, *elmo1*<sup>-/-</sup> and *elmo1*<sup>-/-</sup>:35Sp:ELMO1::GFP dark-grown seedlings were stained with Ruthenium Red and visualized under UV to detect GFP. Magnification of the same seedlings in Fig. 5A are shown in Fig. 5B. The results indicate that not only does the ELMO1-GFP fusion express in hypocotyls, but the fusion protein can also rescue the *elmo1* mutation such that transformants have no adhesion defects and do not stain with dye (Fig. 5A).

To determine where the ELMO-GFP is localized, a z-stack was generated by confocal microscopy and 3D rendering, and Fig. 6 shows that ELMO-GFP accumulated in a network of cytoplasmic organelles throughout the single root cell displayed. A similar localization was seen in all tissue types of the plant. Plants expressing ELMO1-GFP were then crossed to plants expressing one of five mCherry Wave line markers for cellular compartments; Golgi GOT1, Golgi MEMB12, ER NLM1, post Golgi endosome RABE1D and vacuole Vamp711 (Geldner et al., 2009). The F1 seeds of the cross were grown on agar plates and visualized by confocal microscopy. Fig. 7 shows that the two Golgi markers (red) had significant overlap in localization with ELMO1-GFP. ELMPO-GFP appeared to be distinct from the endoplasmic reticulum (ER), post Golgi and vacuole

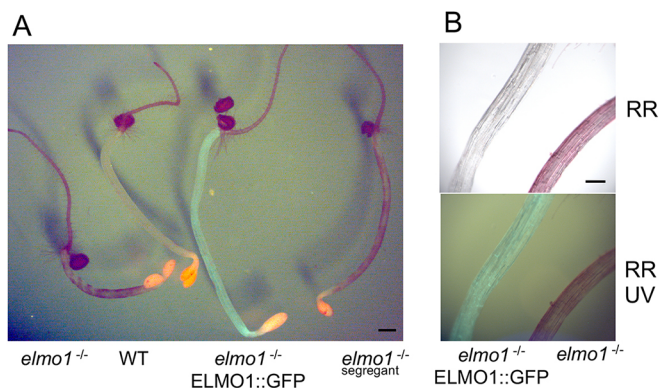

**Fig. 5. 35S::At2g35280::GFP complements *elmo1*<sup>-/-</sup>.** (A) Ruthenium Red-stained dark-grown hypocotyls of *elmo1*<sup>-/-</sup> or *elmo1*<sup>-/-</sup> transformed with 35S::At2g3250::GFP (ELMO::GFP) visualized under 488 nm excitation and 510 nm emission light for GFP. Sufficient white light was included to also visualize the whole seedling. (B) Magnification of the hypocotyl of *elmo1*<sup>-/-</sup> 35S::At2g3250::GFP (ELMO::GFP) and *elmo1*<sup>-/-</sup> dark-grown seedling detecting Ruthenium Red (RR) and GFP. Scale bars: 0.5 mm (A); 200 μm (B).

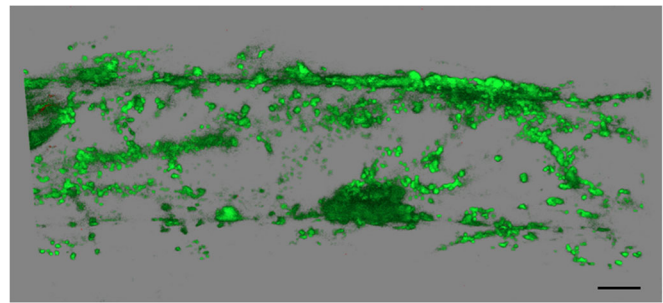

**Fig. 6. 35S::At2g35280::GFP localization.** A confocal microscope z-stack was generated using 488 nm excitation and 510 nm emission of *elmo1*<sup>-/-</sup> 35S::At2g35280::GFP, and Leica software was used to render a 3D image. A single root cell is shown. Scale bar: 10 μm.

markers, confirming that ELMO1-GFP is a Golgi protein. In some images, ELMO1-GFP appeared in rings, indicative of Golgi membrane structures. GOT1-RFP was detected within some of these rings, but it is not known if this represents a luminal distribution of GOT1 within a Golgi body. Although the proteomic analysis (Parsons et al., 2019) identified ELMO1 as a medial Golgi protein, the analysis here was only able to localize ELMO1 to the Golgi, not to a specific compartment within the Golgi.

### *elmo1* has reduced mannose

There are multiple causes for loss of cell adhesion, and to determine how *elmo1*<sup>-/-</sup> might induce a defect, a total cell wall analysis was performed (Fig. 8). No difference between *elmo1*<sup>-/-</sup> and WT was detected for cellulose, or any of the neutral sugars (unpaired two

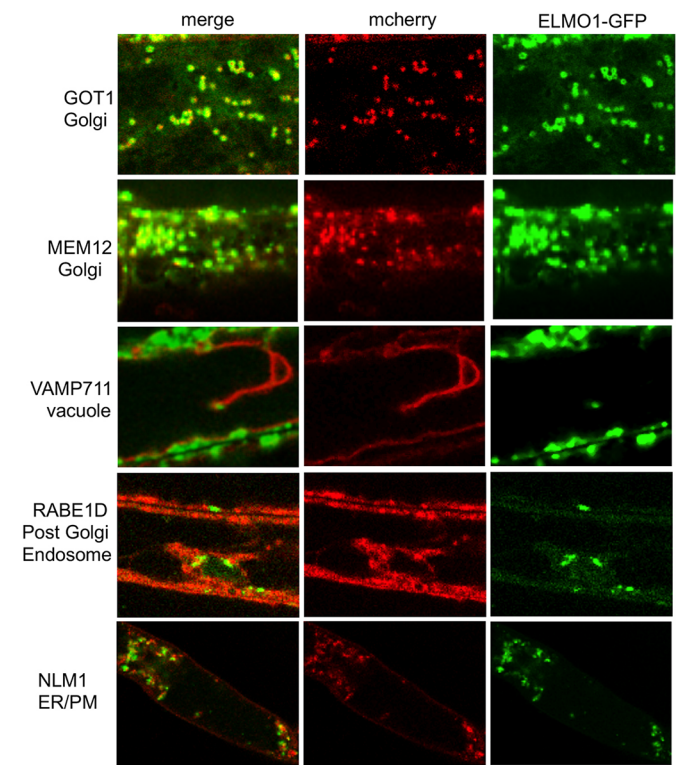

**Fig. 7. 35S::At2g35280::GFP colocalizes with Golgi markers.** Seedlings expressing *elmo1*<sup>-/-</sup> 35S::At2g35280::GFP and the indicated marker protein-mCherry fusion were visualized by sequential confocal microscope scanning. Green is GFP, red is mCherry. Scale bar: 10 μm.

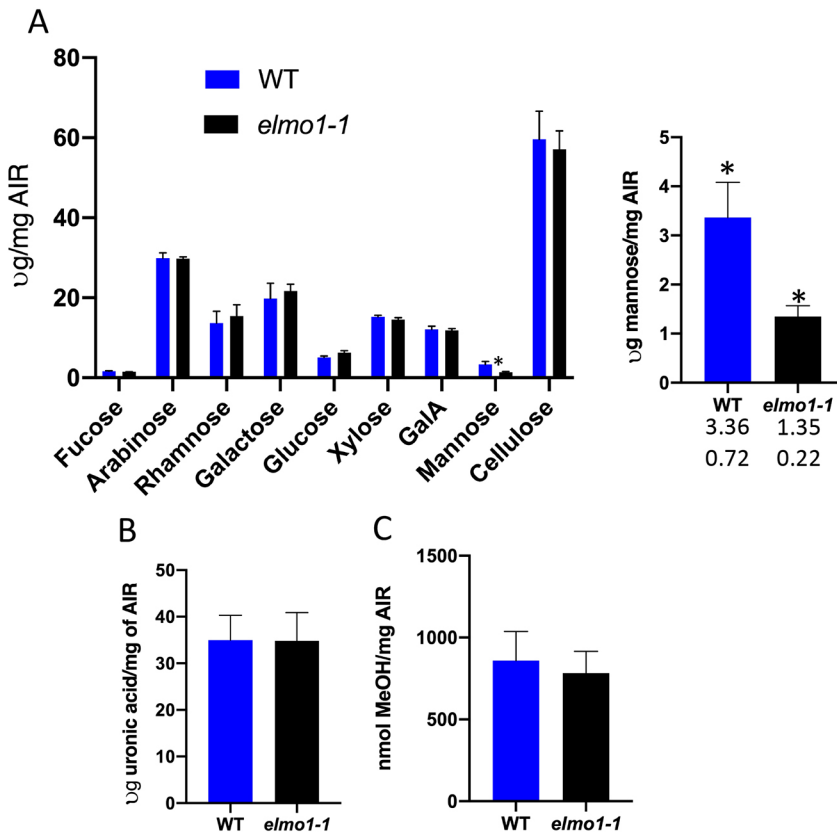

**Fig. 8. *elmo1*<sup>-/-</sup> has reduced mannose.** (A-C) An alcohol insoluble fraction (AIR) from dark-grown seedlings was used to measure, by HPAEC-PAD, neutral sugars content and cellulose. (A) No significant differences between *elmo1*<sup>-/-</sup> and WT were detected (unpaired two tailed *t*-test,  $P > 0.05$ ) for all sugars and cellulose except for mannose. The mannose levels are also shown on a larger scale to the right [numbers below each bar show mean (top) and standard deviation (bottom)]. \* $P < 0.01$  (unpaired two tailed *t*-test). (B) Pectin was measured by extracting uronic acids with ammonium oxalate from the indicated genotype. (C) Total released methanol from AIR preparations indicates degree of pectin methylesterification between the indicated genotype. No significant differences were detected (unpaired two tailed *t*-test,  $P > 0.05$ ).

tailed *t*-tests,  $P > 0.01$ ; Fig. 8A), except a 2.6-fold reduction (unpaired two tailed *t*-test  $P < 0.01$ ) in mannose levels. In addition, both the galacturonic acid levels in the ammonium oxalate-extracted alcohol insoluble residue (AIR) (GalA; unpaired two tailed *t*-test,  $P > 0.05$ ; Fig. 8A) and ammonium oxalate-extracted galacturonic acid (unpaired two tailed *t*-test,  $P > 0.05$ ; Fig. 8B) are the same for *elmo1*<sup>-/-</sup> and WT. The absolute levels of pectin methylesterification were also unchanged (unpaired two tailed *t*-test,  $P > 0.05$ ; Fig. 8C) in *elmo1*<sup>-/-</sup> relative to WT levels.

Mutations in *esmd1-1*, a DUF246-containing protein (Verger et al., 2016), can suppress adhesion mutations that are effected by both reduced pectin content in *qua2-1* (Mouille et al., 2007) and *qua1-1* (Bouton et al., 2002), but also the *frb1* mutant that alters pectin esterification, glucose and arabinose levels. As *elmo1-1* reduced the mannose content, and caused a milder adhesion defect than *qua* and *frb1* mutants, it was of interest to see whether *esmd1-1* could suppress *elmo1-1*. *elmo1-1*<sup>-/-</sup> was crossed with *esmd1-1*<sup>-/-</sup> and the F2 were screened by PCR and sequencing of the two genes for plants homozygous for both mutations. Fig. S5 shows dark-grown Ruthenium Red-stained seedlings from WT, *elmo1-1*<sup>-/-</sup>, *esmd1-1*<sup>-/-</sup> and *elmo1-1*<sup>-/-</sup>/*esmd1-1*<sup>-/-</sup> individuals and indicates that *esmd1-1* can indeed suppress *elmo1-1*<sup>-/-</sup>, as the phenotype is restored to WT.

### ELMO family

Database queries indicate that At2g32580 (*ELMO1*) has five *Arabidopsis* homologs that have all been named DUF1068 (UniProt) and have similar predicted molecular weights. Fig. S3A shows the sequence identity, with At2g32580 highlighted in dark blue, and lighter blue indicating similar amino acids. *ELMO1* is also conserved throughout the angiosperms (Fig. S3B). All of these genes are predicted to encode putative transmembrane Golgi

proteins of similar molecular weight, and also of unknown function but with a predicted coiled-coil structure (DUF1068, TAIR; UniProt). At4g04460 is listed in Fig. S3A but can only be detected through National Institutes of Health (NIH) blast searches, and is not listed on any *Arabidopsis* database, is not annotated in the genome, and may therefore reflect a variant of one of the other *ELMO*s. We suggest that the *ELMO1* homologues be given the name *ELMO1-5*; *ELMO1* At2g32580, *ELMO2* At1g05070, *ELMO3* At4g04360, *ELMO4* At4g30996, *ELMO5* At2g24290. Surveys of expression databases show that *ELMO1* is expressed in seeds, seedlings, roots, leaves, stems and all flower structures except for very low levels in pollen (<http://aranet.sbs.ntu.edu.sg/responder.py?name=gene!ath!630>). The *ELMO* family members have similar expression patterns, although some tissues vary in level. Co-expression analysis finds that the five *ELMO* family members are all co-expressed (<http://genemania.org/search/arabidopsisthaliana/At2g32580>). The similar Golgi local amino acid conservation and expression patterns predict that the *ELMO* family members have similar or related functions, and are somehow involved in cell adhesion. To test this prediction, T-DNA alleles of each gene were obtained from the ABRC (*elmo2*, SALK205719C; *elmo3*, SALK20486C; *elmo4*, Salk 1398222), verified by PCR for the presence of the T-DNA, and then screened for plants homozygous for the allele. In addition, *elmo1-1*<sup>-/-</sup> was crossed with *elmo2*<sup>-/-</sup>, and an F2 plant identified that was homozygous for both alleles (*elmo1-1*<sup>-/-</sup>/*elmo2*<sup>-/-</sup>). Dark-grown 4-day-old seedlings were stained with Ruthenium Red (Fig. 9A). As expected, WT hypocotyls did not stain, and *elmo1-1*<sup>-/-</sup> exhibited the expected hypocotyl cell curling and Ruthenium Red staining. Although *elmo2*<sup>-/-</sup> appeared to be similar to WT, *elmo1-1*<sup>-/-</sup>/*elmo2*<sup>-/-</sup> seedlings had a dramatic cell adhesion phenotype, with frequent cell sloughing and strong Ruthenium Red staining. Confocal microscopy imaging of



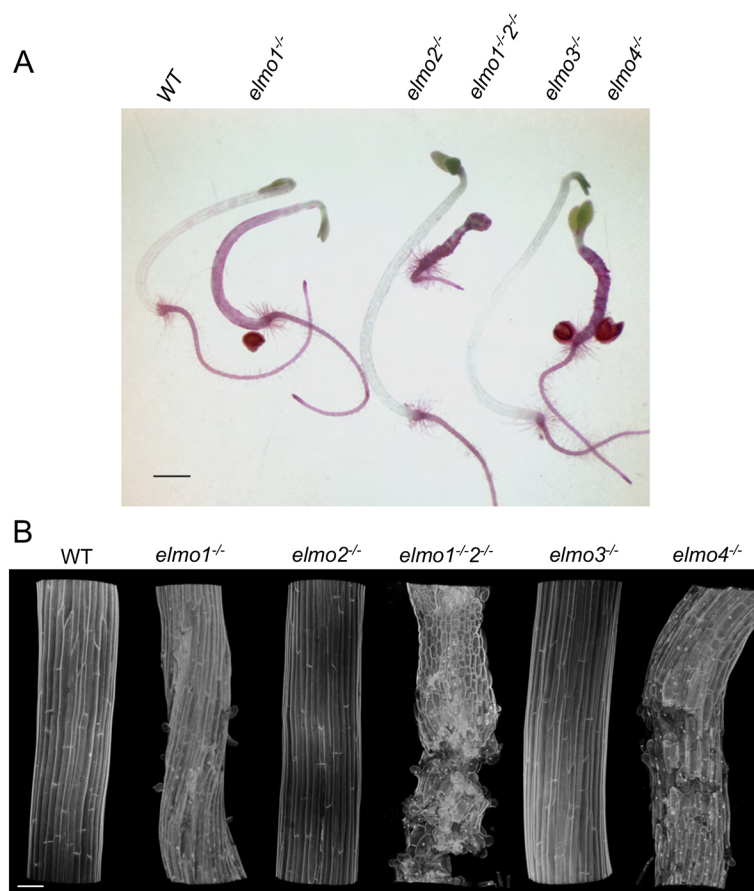

**Fig. 9. Mutations in the *ELMO* family have adhesion defects.** (A) Dark-grown hypocotyls of the indicated genotype were stained with Ruthenium Red. (B) Confocal microscopy imaging of propidium iodide-stained dark-grown hypocotyls of the indicated genotype. Scale bars: 1 mm (A); 50  $\mu$ m (B).

propidium iodide-stained dark-grown hypocotyls confirmed the observations of the Ruthenium Red images (Fig. 9B). The results suggest that *ELMO1* and *ELMO2* are partially redundant. No visible adhesion defects were seen in *elmo3*<sup>-/-</sup> plants and they appeared to be similar to WT, yet *elmo4*<sup>-/-</sup> had a dramatic cell adhesion phenotype, with Ruthenium Red staining and sloughing and curling cells. It remains to be determined what the effect of each of these alleles is on gene expression and the cell wall, but these initial results provide support for the conclusion that *ELMO1* is important for cell adhesion, and that the family members may play a similar role. Further work is needed to fully characterize the family, their interactions, and their role in cell adhesion and plant growth.

## DISCUSSION

To identify new mutants in cellular adhesion, a Ruthenium Red staining assay was used on a population of EMS-mutagenized *Arabidopsis*. One isolate *elmo1* has a 3' splice junction mutation in At2g32580 that altered mRNA levels and leads to cell curling, Ruthenium Red staining, shortened hypocotyls and some leaf cell disturbance. *elmo1*<sup>-/-</sup> mutants have a reduced level of mannose, but no other cell wall changes were detected. A 35Sp:At2g32580 and a GFP fusion of the encoded protein can complement *elmo1-1*, indicating that the adhesion defect is caused by a mutation of this gene. The plant-specific protein ELMO1 localizes to the Golgi and is predicted to be a 20 kDa coiled-coil protein in the Golgi lumen with one membrane anchor, and no known binding or catalytic domains.

The *elmo1* mutant line shares phenotypic similarity with *qua1-1*, *qua2-1* and *frb-1* adhesion mutants. Dark-grown *qua1-2* exhibits curling along the hypocotyl, gapping between cells, as well as

shorter hypocotyls compared with the WT (Bouton et al., 2002). Shorter hypocotyls are also characteristic of the *elmo1* phenotype, and confocal microscopy of *elmo1-1* detects similar gapping between cells. The curling and sloughing of cells in the *elmo1-1* mutant line also creates a lumpy texture along the hypocotyl, like the *qua1-1* mutant, but far less pronounced. Like *elmo1*, cell protrusion also occurs in the cotyledons and leaves in *qua1-1* mutants in addition to the hypocotyl, giving these tissues a rough and bubbling appearance (Bouton et al., 2002). The same is true of *frb1-1* mutants, which show sloughing of the cells so severe that tissues appear as if they are crumbling (Neumetzler et al., 2012). Cell protrusion and sloughing at the hypocotyls also occurs in the *qua2-1* mutant, along with reduced hypocotyl length and dwarfed growth in mature plants (Mouille et al., 2007). Thus, although the *elmo1-1* phenotype shares phenotypic characteristics with these mutants, overall the effect of the mutation in *elmo1* appears less severe than mutations in *QUA1*, *QUA2* and *FRB1*.

The presence of ELMO-like genes could provide some functional redundancy for *ELMO1*, and may help to explain why the *elmo1-1* mutant has a weak phenotype relative to other loss-of-function mutants such as *frb1* and *qua2* that affect adhesion. Indeed, the initial screen of T-DNA alleles in *ELMO2*, *ELMO3* and *ELMO4* indicates that *ELMO1* and *ELMO2* are partially redundant. As the *elmo4* T-DNA allele alone has a strong adhesion phenotype, it is possible that the family lacks redundancy for ELMO4 function; however, further analysis of the strength of each allele, their effect on gene expression and on the cell wall is needed before further conclusions can be made.

The hypothesis that ELMO1 is not an enzymatic protein is supported by its size and predicted structure. At2g32580 encodes a

protein 183 amino acids in length with a molecular weight of 19.967 kDa. Database searches fail to identify similarities to known enzyme classes of any kind, suggesting that ELMO1 is not involved directly in the enzymatic production of the cell wall. Although it was expected that *elmo1* might reduce the pectin content of the cell wall, as both *qua1* and *qua2* adhesion mutants affect pectin, no reduction in pectin was detected relative to WT. Instead, the only change detected in *elmo1* was a 2.6-fold reduction in mannose, but it is not clear that the mannose change is causative of the adhesion phenotype. Rather, the mannose change might be result of a secondary or indirect effect of *elmo1-1*. Additional analysis of cell wall carbohydrates and proteins will be essential to identify the causative agent of reduced adhesion.

Although certainly causing structural changes to the cell walls (Goubet et al., 2009; Miedes et al., 2013; Xiao et al., 2016), a reduction in the hemicelluloses glucomannan and galactomannan have not been reported to lead to adhesion defects in angiosperms. In addition, changes to other hemicelluloses such as xyloglucan may change the structural integrity and spacing of the cell wall, but they do not lead to adhesion defects (Xiao et al., 2016). Moreover, *elmo1-1* appears to have no changes in cell wall sugars that would suggest a reduction in hemicelluloses.

Mannose is also found as an essential component of both O-linked and N-linked glycosylated proteins and within glycosylphosphatidylinositol (GPI) anchors (Paulick and Bertozzi, 2008; Strasser, 2016). However, there appear to be no reports of O-linked mannose on proteins required for cell wall function, although this work suggests this is a possibility. AGPs are rich in arabinan and galactan O-linked polysaccharide side chains (Showalter and Basu, 2016), yet the *elmo1-1* cell wall analysis detects no change in these sugars, indicating that AGPs are not affected. If *elmo1-1* were to affect the core mannose-containing N-linked oligosaccharide added to many proteins in the ER, then one would expect a more pleiotropic and stronger phenotype and additional changes in the cell wall sugar profile. These are not seen, and moreover, ELMO1 is a Golgi and not an ER protein. Although a role for ELMO1 in the core N-linked glycosylation is less likely, *elmo1* could have a more specific effect on the GPI anchor of numerous proteins including AGPs, and this in turn might affect cell adhesion. However, this too is less likely as the GPI anchor is synthesized and added in the ER, not near Golgi-localized ELMO1 (Strasser, 2016). A more thorough exploration of AGP structure and modification in *elmo1* may address these possibilities. A mutation in a protein of unknown function, DUF246 (MSR1/2), has been noted to have reduced mannose, but it is not known if there are any cell adhesion phenotypes (Wang et al., 2013). Glycosylated sphingolipids (GIPCs) are also mannosylated, and a mutant of Golgi-localized GIPC mannosyltransferase (GMT1) leads to ectopically parting cells, a cell adhesion phenotype and reduced cellulose content (Fang et al., 2016). Each of these proteins need to be evaluated as potential candidates that might be altered in *elmo1-1*<sup>-/-</sup>.

There is, however, a strong possibility that the ELMO family is involved in a quality control mechanism for the export of cell wall-related proteins from the Golgi. Mutants of Golgi mannosidase activity, despite having no apparent phenotype alone, enhance the effects of cell wall mutants *rsw2*, *cob1* and *cesa6* (Liebminger et al., 2009). The mannosidase trimming is required for prevention of aggregation of folding intermediates, and is thought to be part of the quality control (Strasser, 2016). Perhaps ELMO1 provides an accessory protein or scaffold for these processes specific for cell wall proteins, possibly specific for those involved in adhesion. Scaffold proteins, which recruit and link proteins in a complex,

facilitate the activity of enzymatic and signal transduction pathways (Lim et al., 2019; Pawson and Scott, 1997). There are examples of enzyme complexes in the biosynthetic pathways of carbohydrates in wheat (Tetlow et al., 2008), the likely formation of complexes in flavonoid synthesis, (Burbulis and Winkel-Shirley, 1999) and non-enzymatic proteins involved in starch metabolism in the chloroplast of *A. thaliana* (Lohmeier-Vogel et al., 2008). Non-enzymatic scaffold proteins might play an important role in the assembly of ECM carbohydrates that affect cellular adhesion, and ELMO1 may serve this function. The observation that *esmd1*, which suppresses multiple pectin-dependent adhesion defects such as *qua2* and *frb1*, also suppresses *elmo1*, provides further evidence that ELMO1 is involved in the cell adhesion pathway. Analysis of the genetic interaction with other genes and the physical association of ELMO1 with other proteins will reveal the role that ELMO1, the ELMO family and mannose play in cell adhesion and cell wall assembly.

## MATERIALS AND METHODS

### Plant growth conditions

*Arabidopsis thaliana* seeds were sterilized for 5 min in 95% ethanol and then 5 min in 10% bleach and rinsed twice with sterile dH<sub>2</sub>O. Seeds were then grown in liquid or agar containing Murashige and Skoog (MS) media (Sigma-Aldrich) (pH 5) with 2% agarose and 1% sucrose or planted directly onto soil. Following plating, seeds were exposed to cold (4°C) for 48 h, then exposed to light for 4 h at 20°C and grown at 20°C for 4 days in the dark. Seeds planted directly on soil were exposed to cold (4°C) for 48 h and grown with a cover on. For in-experiment comparisons, samples were grown at the same time in triplicate. Plants were imaged using a Nikon D3000 camera.

### Mutant identification

To identify *A. thaliana* mutants with abnormal cellular adhesion, approximately 5000 M1 plants grown from EMS-mutagenized seeds were grown on soil (Rédei and Koncz, 1992). M2 generation seeds were then collected in 191 pools (each pool contained the progeny of approximately 20-30 plants) and 400 seeds from each pool were then grown for 4 days in the dark in liquid media after sterilization and stained with Ruthenium Red dye (Verger, 2014). Liquid media was removed and 3 ml of Ruthenium Red dye (Sigma Corporation, 0.5 mg/ml in dH<sub>2</sub>O) was applied to seedlings for 2 min in a 10 ml microtiter growth plate. After 2 min, seedlings were washed twice with 5 ml of dH<sub>2</sub>O. Hypocotyl staining was then observed under a dissecting microscope, and mutants were isolated and plated on MS agarose for 5 days in light conditions before being transferred to soil.

### DNA extraction and PCR

Three-week old healthy green leaves from plants of interest were collected, frozen in liquid N<sub>2</sub> and DNA was extracted as previously described (Kohorn et al., 2016). The indicated genes were PCR amplified according to the manufacturer's conditions using Titanium Taq DNA polymerase (Takara Bio) using the following primers: *QUA2* F, 5'-CAGGGATCTTAGATTT-ATAGCAGCAAC-3'; *QUA2* R, 5'-GAAACCGAACCGGAAACATA-3'; *ESMD1F*, 5'-GGCGATAGGTTCAATGATGAATTAAG-3'; *ESMD1R*, 5'-CCAAGTAAAGGGAAATATGAACATGATTATTG ATGATGTAC-3'. PCR samples were sequenced by Retrogen.

### *elmo1* F2 whole-genome sequencing

The pooled DNA preparations of 100 *elmo1* individuals of an *elmo1*×WT Col0 F2 progeny were sequenced with Illumina genome sequencing technology performed by Novogene. Analysis of the *elmo1* F2 allele frequencies was performed using the data file provided by Novogene and the programs artMAP (used to identify the allele frequencies) (Javorka et al., 2019) and IGV (used to visualize the genome sequence) (Thorvaldsdóttir et al., 2012).

### Cell wall preparation

Four-day old dark-grown whole seedlings (roots, hypocotyls and cotyledons) were pooled and immersed in 96% ethanol and incubated at



80°C for 15 min twice, homogenized using a ball homogenizer for 20 min, centrifuged for 15 min at 20,000 g, and the supernatant was removed and the pellet re-suspended in acetone and centrifuged for 15 min at 20,000 g. The supernatant was then removed and the pellet was re-suspended in methanol: chloroform (2v:3v) and shaken overnight. Samples were then centrifuged for 15 min at 20,000 g and the supernatant was removed. The pellet was then re-suspended sequentially in 100%, 65%, 80%, and 100% ethanol. After each re-suspension samples were centrifuged at 20,000 g for 15 min and the supernatant was removed and the pellet of AIR dried under vacuum. This AIR was saponified overnight in 200 µL of 0.05 M NaOH and the samples were centrifuged at 4°C, 10,000 g for 10 min. Methylesterification of the pectin was quantified by measurement of the methanol content in the supernatant (Verger et al., 2016). The pellet was then washed twice with 70% ethanol (to remove residual NaOH) and twice with acetone at room temperature. The samples were not destarched. The residual pellet was air dried under vacuum and extracted with ammonium oxalate as previously described (Verger et al., 2016; Neumetzler et al., 2012). Ammonium oxalate-extracted uronic acid content was determined according to methods in Blumenkrantz and Asboe-Hansen (1973). The pellet was then washed twice with 70% ethanol (to remove residual ammonium oxalate) and twice with acetone at room temperature. Neutral monosaccharide composition analysis of the non-crystalline polysaccharide fraction and cellulose were performed on this ammonium oxalate extracted pellet (referred to as ammonium oxalate extracted AIR) after hydrolysis in 2.5 M trifluoroacetic acid for 1.5 h at 100°C as previously described (Harholt et al., 2006; Verger et al., 2016). The released monosaccharide was quantified using HPAEC-PAD chromatography as described in Harholt et al. (2006). Three biological replicates were analyzed.

### Expression of ELMO

The coding region of At2g32580 was PCR amplified using the following primers: At2g32580Fnc0, 5'-CCATGGCGAAGCACACCGG-3'; At2g32580Bamstop (no GFP tag), 5'-GGATCCTTAAGCAACCTCAGT-GCCGC-3'; At2g32580Bamstop, 5'-GGATCCGACCAACCTCAGT-GCCGC-3'. The products were cloned into the NcoI BglII restriction enzyme sites of pCambia 1302. Plasmids were then transformed into *Agrobacterium* and the floral dip method (Clough and Bent, 1998) was used for transformation of *elmo1-1<sup>-/-</sup> A. thaliana* Col0.

### Confocal microscopy

Four-day-old dark grown seedlings were stained for 10 min with 10 µg/mL propidium iodide, and then washed once in dH<sub>2</sub>O. Hypocotyls were then visualized by confocal microscopy on a Leica SP8 microscope using a 10× objective, a 514 nm excitation laser and an emission spectrum of 617 nm. A z-stack was then created for the seedling using the Leica SP8 software. GFP and mCherry fusion proteins were detected by sequential scanning on the Leica SP8 at the following wavelengths: GFP, excitation 488 nm, emission 510-515 nm; mCherry, excitation 587 nm, emission 610 nm. The following Wave line *Arabidopsis* seed stocks expressing sub-cellular markers were obtained from ABRC as described in Geldner et al. (2009): ATMEMB12 At5g50440 Golgi, GOT1 At3g03180 Golgi, ATRABE1D At5g03520 Post Golgi/endosomal, VAMP711 At4g32150 late endosome/prevacuolar compartment, AT-NLMI NOD26-like intrinsic protein1 ER/plasma membrane. The pcambia1302ELMO1-GFP plasmid was transformed using *Agrobacterium* into each marker plant line as described above, and the T1 seeds were visualized using confocal microscopy.

### RNA quantification

RNA from *elmo1* M3 and WT plants was extracted from dark-grown hypocotyls using the RNeasy Plant Mini Kit according to kit instructions (Qiagen). cDNA from 1 µg of RNA was synthesized using an Invitrogen Superscript III First Strand Kit (Thermo Fisher Scientific) according to manufacturer's conditions. RT-qPCR was performed using SYBR green dye (Thermo Fisher Scientific) in an Applied Biosystems StepOne system as previously described (Kohorn et al., 2016). Biological triplicates were run for each sample and relative expression was calculated relative to an actin control. Analysis was carried out using the Applied Biosystems supplied software and prism. Primers used were: At2g32580FRT,

5'-GTGATCCAGAGGTGAACGAAGACAC-3'; At2g32580RRT, 5'-CC-TCAGTGCCGCTTTTGGATTAAACAG-3'.

### Acknowledgements

We thank Stephane Verger and Julien Sechet for thoughtful discussions.

### Competing interests

The authors declare no competing or financial interests.

### Author contributions

Conceptualization: B.D.K., G.M.; Methodology: B.D.K.; Software: B.D.K.; Validation: B.D.K.; Formal analysis: B.D.K.; Investigation: B.D.K., F.D.H.Z., J.D.-M., S.C., G.M., S.K.; Resources: B.D.K.; Data curation: B.D.K.; Writing - original draft: B.D.K.; Writing - review & editing: B.D.K., F.D.H.Z., G.M.; Visualization: B.D.K.; Supervision: B.D.K.; Project administration: B.D.K.; Funding acquisition: B.D.K.

### Funding

The work was supported by the National Science Foundation grant IOS 1556057, and an Institutional Development Award (IDeA) from the National Institute of General Medical Sciences of the National Institutes of Health under grant number P20GM103423. This work has also benefited from a French State grant from Labex Saclay Plant Sciences (ANR-10-LABX-0040-SPS, ANR-17-EUR-0007 and EUR SPS-GSR). Deposited in PMC for release after 12 months.

### Data Availability

Sequencing data have been deposited in SRA under accession number PRJNA727485.

### References

- Blumenkrantz, N. and Asboe-Hansen, G. (1973). New method for quantitative determination of uronic acids. *Anal. Biochem.* **54**, 484-489. doi:10.1016/0003-2697(73)90377-1
- Bouton, S., Leboeuf, E., Mouille, G., Leydecker, M. T., Talbotec, J., Granier, F., Lahaye, M., Höfte, H. and Truong, H. N. (2002). QUASIMODO1 encodes a putative membrane-bound glycosyltransferase required for normal pectin synthesis and cell adhesion in *Arabidopsis*. *Plant Cell* **14**, 2577-2590. doi:10.1105/tpc.004259
- Burbulis, I. E. and Winkel-Shirley, B. (1999). Interactions among enzymes of the *Arabidopsis* flavonoid biosynthetic pathway. *Proc. Natl. Acad. Sci. U.S.A.* **96**, 12929-12934. doi:10.1073/pnas.96.22.12929
- Clough, S. J. and Bent, A. F. (1998). Floral dip: a simplified method for *Agrobacterium*-mediated transformation of *Arabidopsis thaliana*. *Plant J.* **16**, 735-743. doi:10.1046/j.1365-313x.1998.00343.x
- Daher, F. B. and Braybrook, S. A. (2015). How to let go: pectin and plant cell adhesion. *Frontiers in plant science* **6**, 523. doi:10.3389/fpls.2015.00523
- Drakakaki, G. (2015). Polysaccharide deposition during cytokinesis: challenges and future perspectives. *Plant Sci* **236**, 177-184. doi:10.1016/j.plantsci.2015.03.018
- Du, J., Kirui, A., Huang, S., Wang, L., Barnes, W. J., Kiemle, S. N., Zheng, Y., Rui, Y., Ruan, M., Qi, S. et al. (2020). Mutations in the pectin methyltransferase QUASIMODO2 influence cellulose biosynthesis and wall integrity in *Arabidopsis*. *Plant Cell* **32**, 3576-3597. doi:10.1105/tpc.20.00252
- Fang, L., Ishikawa, T., Rennie, E. A., Murawska, G., Lao, J., Yan, J., Tsai, A. Y., Baidoo, E. E. K., Xu, J., Keasling, J. D. et al. (2016). Loss of inositol phosphorylceramide sphingolipid mannosylation induces plant immune responses and reduces cellulose content in *Arabidopsis*. *Plant Cell* **28**, 2991-3004. doi:10.1105/tpc.16.00186
- Geldner, N., Dénervaud-Tendon, V., Hyman, D. L., Mayer, U., Stierhof, Y. D. and Chory, J. (2009). Rapid, combinatorial analysis of membrane compartments in intact plants with a multicolor marker set. *Plant J.* **59**, 169-178. doi:10.1111/j.1365-313x.2009.03851.x
- Gendre, D., Oh, J., Boutté, Y., Best, J. G., Samuels, L., Nilsson, R., Uemura, T., Marchant, A., Bennett, M. J., Grebe, M. et al. (2011). Conserved *Arabidopsis* echidna protein mediated trans-golgi-network trafficking and cell elongation. *Proc. Natl. Acad. Sci. USA* **108**, 8048-8053. doi:10.1073/pnas.1018371108
- Gendre, D., McFarlane, H. E., Johnson, E., Mouille, G., Sjodin, A., Oh, J., Levesque-Tremblay, G., Watanabe, Y., Samuels, L. and Bhalerao, R. P. (2013). Trans-Golgi network localized ECHIDNA/Ypt interacting protein complex is required for the secretion of cell wall polysaccharides in *Arabidopsis*. *Plant Cell* **25**, 2633-2646. doi:10.1105/tpc.113.112482
- Goubet, F., Barton, C. J., Mortimer, J. C., Yu, X., Zhang, Z., Miles, G. P., Richens, J., Liepman, A. H., Seffen, K. and Dupree, P. (2009). Cell wall glucomannan in *Arabidopsis* is synthesised by CSLA glycosyltransferases, and influences the progression of embryogenesis. *Plant J.* **60**, 527-538. doi:10.1111/j.1365-313x.2009.03977.x
- Harholt, J., Jensen, J. K., Sørensen, S. O., Orfila, C., Pauly, M. and Scheller, H. V. (2006). ARABINAN DEFICIENT 1 is a putative arabinosyltransferase

- involved in biosynthesis of pectic arabinan in Arabidopsis. *Plant Physiol.* **140**, 49-58. doi:10.1104/pp.105.072744
- Harholt, J., Suttangkakul, A. and Vibe Scheller, H. (2010). Biosynthesis of pectin. *Plant Physiol.* **153**, 384-395. doi:10.1104/pp.110.156588
- Javorka, P., Raxwal, V., Najvarek, J. and Riha, K. (2019). artMAP: a user-friendly tool for mapping EMS-induced mutations in Arabidopsis. *Plant Direct* **3**, e00146. doi:10.1002/pld3.146
- Jonsson, K., Lathe, R. S., Kierzkowski, D., Routier-Kierzkowska, A. L., Hamant, O. and Bhalerao, R. P. (2021). Mechanochemical feedback mediates tissue bending required for seedling emergence. *Curr. Biol.* **31**, 1-11. doi:10.1016/j.cub.2020.12.016
- Keegstra, K. (2010). Plant cell walls. *Plant Physiol.* **154**, 483-486. doi:10.1104/pp.110.161240
- Kjellbom, P., Snogerup, L., Stohr, C., Reuzeau, C., McCabe, P. F. and Pennell, R. I. (1997). Oxidative cross-linking of plasma membrane arabinogalactan proteins. *Plant J.* **12**, 1189-1196. doi:10.1046/j.1365-313X.1997.12051189.x
- Kohorn, B. D., Hoon, D., Minkoff, B. B., Sussman, M. R. and Kohorn, S. L. (2016). Rapid oligo-galacturonide induced changes in protein phosphorylation in Arabidopsis. *Molecular & cellular proteomics: MCP* **15**, 1351-1359. doi:10.1074/mcp.M115.055368
- Krupková, E., Immerzeel, P., Pauly, M. and Schmülling, T. (2007). The TUMOROUS SHOOT DEVELOPMENT2 gene of Arabidopsis encoding a putative methyltransferase is required for cell adhesion and coordinated plant development. *Plant J.* **50**, 735-750. doi:10.1111/j.1365-313X.2007.03123.x
- Leboeuf, E., Guillon, F., Thoirion, S. and Lahaye, M. (2005). Biochemical and immunohistochemical analysis of pectic polysaccharides in the cell walls of Arabidopsis mutant QUASIMODO 1 suspension-cultured cells: implications for cell adhesion. *J. Exp. Bot.* **56**, 3171-3182. doi:10.1093/jxb/eri314
- Liebming, E., Huttner, S., Vavra, U., Fischl, R., Schoberer, J., Grass, J., Blaukopf, C., Seifert, G. J., Altmann, F. and Mach, L. et al. (2009). Class I alpha-mannosidases are required for N-glycan processing and root development in Arabidopsis thaliana. *Plant Cell* **21**, 3850-3867. doi:10.1105/tpc.109.072363
- Lim, S., Jung, G. A., Glover, D. J. and Clark, D. S. (2019). Enhanced enzyme activity through scaffolding on customizable self-assembling protein filaments. *Small* **15**, e1805558. doi:10.1002/smll.201805558
- Lohmeier-Vogel, E. M., Kerk, D., Nimick, M., Wrobel, S., Vickerman, L., Muench, D. G. and Moorhead, G. B. (2008). Arabidopsis At5g39790 encodes a chloroplast-localized, carbohydrate-binding, coiled-coil domain-containing putative scaffold protein. *BMC Plant Biol.* **8**, 120. doi:10.1186/1471-2229-8-120
- Miao, Y., Li, H. Y., Shen, J., Wang, J. and Jiang, L. (2011). QUASIMODO 3 (QUA3) is a putative HG methyltransferase regulating cell wall biosynthesis in Arabidopsis suspension-cultured cells. *J. Exp. Bot.* **62**, 5063-5078. doi:10.1093/jxb/err211
- Miart, F., Desprez, T., Biot, E., Morin, H., Belcram, K., Hofte, H., Gonneau, M. and Vernhettes, S. (2014). Spatio-temporal analysis of cellulose synthesis during cell plate formation in Arabidopsis. *Plant J.* **77**, 71-84. doi:10.1111/tbj.12362
- Miedes, E., Suslov, D., Vandenbussche, F., Kenobi, K., Ivakov, A., Van Der Straeten, D., Lorences, E. P., Mellerowicz, E. J., Verbelen, J. P. and Vissenberg, K. (2013). Xyloglucan endotransglucosylase/hydrolase (XTH) overexpression affects growth and cell wall mechanics in etiolated Arabidopsis hypocotyls. *J. Exp. Bot.* **64**, 2481-2497. doi:10.1093/jxb/ert107
- Mitchell, A. L., Attwood, T. K., Babbitt, P. C., Blum, M., Bork, P., Bridge, A., Brown, S. D., Chang, H., El-Gebali, S. and Fraser, M. I. (2019). InterPro in 2019: improving coverage, classification and access to protein sequence annotations. *Nucleic Acids Res.* **47**, D351-D360. doi:10.1093/nar/gky1100
- Mohnen, D. (2008). Pectin structure and biosynthesis. *Curr. Opin. Plant Biol.* **11**, 266-277. doi:10.1016/j.pbi.2008.03.006
- Mouille, G., Ralet, M. C., Cavellier, C., Eland, C., Effroy, D., Hematy, K., McCartney, L., Truong, H. N., Gaudon, V. and Thibault, J. F. et al. (2007). HG synthesis in Arabidopsis thaliana requires a golgi-localized protein with a putative methyltransferase domain. *Plant J.* **50**, 605-614. doi:10.1111/j.1365-313X.2007.03086.x
- Neumetzler, L., Humphrey, T., Lumba, S., Snyder, S., Yeats, T. H., Usadel, B., Vasilevski, A., Patel, J., Rose, J. K. and Persson, S. et al. (2012). The FRIABLE1 gene product affects cell adhesion in Arabidopsis. *PLoS One* **7**, e42914. doi:10.1371/journal.pone.0042914
- Parsons, H. T., Stevens, T. J., McFarlane, H. E., Vidal-Melgosa, S., Griss, J., Lawrence, N., Butler, R., Sousa, M. M. L., Salemi, M. and Willats, W. G. T. et al. (2019). Separating golgi proteins from cis to trans reveals underlying properties of cisternal localization. *Plant Cell* **31**, 2010-2034. doi:10.1105/tpc.19.00081
- Paulick, M. G. and Bertozzi, C. R. (2008). The glycosylphosphatidylinositol anchor: a complex membrane-anchoring structure for proteins. *Biochemistry* **47**, 6991-7000. doi:10.1021/bi8006324
- Pawson, T. and Scott, J. D. (1997). Signaling through scaffold, anchoring, and adaptor proteins. *Science* **278**, 2075-2080. doi:10.1126/science.278.5346.2075
- Peaucelle, A., Braybrook, S. A., Le Guillou, L., Bron, E., Kuhlemeier, C. and Hofte, H. (2011). Pectin-induced changes in cell wall mechanics underlie organ initiation in Arabidopsis. *Curr. Biol.* **21**, 1720-1726. doi:10.1016/j.cub.2011.08.057
- Persson, S., Caffall, K. H., Freshour, G., Hillel, M. T., Bauer, S., Poindexter, P., Hahn, M. G., Mohnen, D. and Somerville, C. (2007). The Arabidopsis irregular xylem8 mutant is deficient in glucuronoxylan and HG, which are essential for secondary cell wall integrity. *Plant Cell* **19**, 237-255. doi:10.1105/tpc.106.047720
- Rédei, G. P. and Koncz, C. (1992). Classical mutagenesis. In *Methods in Arabidopsis research* (ed. N.-H. Chua, C. Koncz and J. Schell), pp. 16-82. World Scientific, Singapore.
- Reichardt, I., Stierhof, Y. D., Mayer, U., Richter, S., Schwarz, H., Schumacher, K. and Jurgens, G. (2007). Plant cytokinesis requires de novo secretory trafficking but not endocytosis. *Curr. Biol.* **17**, 2047-2053. doi:10.1016/j.cub.2007.10.040
- Ridley, B. L., O'Neill, M. A. and Mohnen, D. (2001). Pectins: structure, biosynthesis, and oligogalacturonide-related signaling. *Phytochemistry* **57**, 929-967. doi:10.1016/S0031-9422(01)00113-3
- Samuels, A. L., Giddings, T. H., Jr. and Staehelin, L. A. (1995). Cytokinesis in tobacco BY-2 and root tip cells: a new model of cell plate formation in higher plants. *J. Cell Biol.* **130**, 1345-1357. doi:10.1083/jcb.130.6.1345
- Sénéchal, F., Wattier, C., Rusterucci, C. and Pelloux, J. (2014). HG-modifying enzymes: structure, expression, and roles in plants. *J. Exp. Bot.* **65**, 5125-5160. doi:10.1093/jxb/eru272
- Shevell, D. E., Kunkel, T. and Chua, N. H. (2000). Cell wall alterations in the arabidopsis emb30 mutant. *Plant Cell* **12**, 2047-2060. doi:10.1105/tpc.12.11.2047
- Showalter, A. M. and Basu, D. (2016). Extensin and arabinogalactan-protein biosynthesis: glycosyltransferases, research challenges, and biosensors. *Frontiers in plant science* **7**, 814. doi:10.3389/fpls.2016.00814
- Šola, K., Gilchrist, E. J., Ropartz, D., Wang, L., Feussner, I., Mansfield, S. D., Ralet, M. C. and Haughn, G. W. (2019). RUBY, a putative galactose oxidase, influences pectin properties and promotes cell-to-cell adhesion in the seed coat epidermis of Arabidopsis. *Plant Cell* **31**, 809-831. doi:10.1105/tpc.18.00954
- Staehelin, L. A. and Hepler, P. K. (1996). Cytokinesis in higher plants. *Cell* **84**, 821-824. doi:10.1016/S0092-8674(00)81060-0
- Strasser, R. (2016). Plant protein glycosylation. *Glycobiology* **26**, 926-939. doi:10.1093/glycob/cww023
- Tan, L., Eberhard, S., Pattathil, S., Warder, C., Glushka, J., Yuan, C., Hao, Z., Zhu, X., Avci, U. and Miller, J. S. et al. (2013). An Arabidopsis cell wall proteoglycan consists of pectin and arabinoxylan covalently linked to an arabinogalactan protein. *Plant Cell* **25**, 270-287. doi:10.1105/tpc.112.107334
- Tetlow, I. J., Beisel, K. G., Cameron, S., Makhmoudova, A., Liu, F., Bresolin, N. S., Wait, R., Morell, M. K. and Emes, M. J. (2008). Analysis of protein complexes in wheat amyloplasts reveals functional interactions among starch biosynthetic enzymes. *Plant Physiol.* **146**, 1878-1891. doi:10.1104/pp.108.116244
- Thorvaldsdóttir, H., Robinson, J. T. and Mesirov, J. P. (2012). Integrative genomics viewer (IGV): high-performance genomics data visualization and exploration. *Brief. Bioinform.* **14**, 178-192. doi:10.1093/bib/bbs017
- van Oostende-Triplet, C., Guillet, D., Triplet, T., Pandzic, E., Wiseman, P. W. and Geitmann, A. (2017). Vesicle dynamics during plant cell cytokinesis reveals distinct developmental phases. *Plant Physiol.* **174**, 1544-1558. doi:10.1104/pp.17.00343
- Verger, S. (2014). Genetic and chemical genomic dissection of the cell adhesion mechanisms in plants. *PhD thesis*, Université Paris Sud, France.
- Verger, S., Chabout, S., Gineau, E. and Mouille, G. (2016). Cell adhesion in plants is under the control of putative O-fucosyltransferases. *Development* **143**, 2536-2540. doi:10.1242/dev.132308
- Verma, D. P. (2001). Cytokinesis and building of the cell plate in plants. *Annu. Rev. Plant Physiol. Mol. Biol.* **52**, 751-784. doi:10.1146/annurev.arplant.52.1.751
- Wang, Y., Mortimer, J. C., Davis, J., Dupree, P. and Keegstra, K. (2013). Identification of an additional protein involved in mannan biosynthesis. *Plant J.* **73**, 105-117. doi:10.1111/tbj.12019
- Willats, W. G., McCartney, L., Mackie, W. and Knox, J. P. (2001). Pectin: cell biology and prospects for functional analysis. *Plant Mol. Biol.* **47**, 9-27. doi:10.1023/A:1010662911148
- Wolf, S. and Höfte, H. (2014). Growth control: a saga of cell walls, ROS, and peptide receptors. *Plant Cell* **26**, 1848-1856. doi:10.1105/tpc.114.125518
- Wormit, A. and Usadel, B. (2018). The multifaceted role of pectin methyltransferase inhibitors (PMEIs). *Int. J. Mol. Sci.* **19**, 2878. doi:10.3390/ijms19102878
- Xiao, C., Zhang, T., Zheng, Y., Cosgrove, D. J. and Anderson, C. T. (2016). Xyloglucan deficiency disrupts microtubule stability and cellulose biosynthesis in Arabidopsis, altering cell growth and morphogenesis. *Plant Physiol.* **170**, 234-249. doi:10.1104/pp.15.01395
